# Supplementary material
Source: Research Square preprint supplement (doi:10.21203/rs.3.rs-8896456/v1)
Supplement: Supplementary file 1 [file e20ad816d6ba80fe6e466309.pdf]

## 1 **Supplementary Text**

### 2 ***Composition and Mineralogy of Chondrule Fragments in OREX-803417-103***

3 Particle OREX-803417-103, ~ 1.5 mm in length, has a pseudo-rectangular morphology and an  
4 irregular surface texture (Fig. 5a). FESEM imaging of the particle's topside and underside reveals  
5 a total of 25 fragments (23 on the upper particle surface and 2 on the underside (not shown))  
6 composed primarily of Mg-rich olivine and infrequent Mg-rich, low-Ca pyroxene. These silicate  
7 grains are elongated with rounded edges and perforated textures separated by void space. Two  
8 of the largest regions, shown at higher magnification in Fig. 5b-e, contain silicate grains ranging  
9 in width from <1 to 3  $\mu\text{m}$ . These grains consist primarily of nearly pure Mg-rich olivine (average  
10 Mg# 97) and low-Ca, Mg-rich pyroxene (average Mg# 97) (see Extended Data Table 5 and  
11 Supplementary Data Table 5). No mesostasis or replacement phyllosilicates were detected within  
12 the pore spaces, although rare occurrences of a Mg-bearing phase compositionally similar to  
13 those observed in OREX-803437-100 (Extended Data Table 2) and OREX-803079-241 (Extended  
14 Data Table 4) are present.

15 XCT analysis of particle OREX-803417-103 identified ~ 18 internal barred fragments, with two  
16 of the largest ranging from ~ 100 to 180  $\mu\text{m}$  in size, having surfaces that partially breach the  
17 exterior surface of the particle (Fig. 5a-e; Supplementary Data Video 3).

### 18 ***Composition and Mineralogy of Chondrule Fragment in OREX-803429-100***

19 Particle OREX-803429-100, ~ 0.65 mm in length, has an elongated triangular morphology and  
20 an irregular surface texture (Fig. 5f). Optical imaging (Fig. 5f, inset) and magnified FESEM imaging  
21 (Fig. 5g) reveal a single chondrule fragment composed of Fe-bearing olivine (average Mg# 73),  
22 and low-Ca, Fe-bearing pyroxene (average Mg# 76) (Extended Data Table 5 and Supplementary  
23 Data Table 5). The elongated silicate grains have rounded edges and are separated by void space.  
24 No mesostasis or replacement phyllosilicates were detected.

### 25 ***On the Nature of the Fluid After Mesostasis Dissolution***

26 The composition of the fluid that dissolved chondrule mesostasis can be approximated from  
27 the chemistry of that mesostasis itself. Semarkona (LL3.0) chondrules provide the best available  
28 analog for this purpose because they are among the least thermally and aqueously altered

29 materials in meteorite collections. Their primary glassy mesostasis is well preserved and has been  
30 chemically characterized at high spatial resolution, offering a robust reference for the unmodified  
31 composition of chondrule melts prior to secondary processing<sup>52</sup>. Although Semarkona belongs to  
32 the ordinary chondrite rather than the carbonaceous chondrite clan, its chondrules broadly share  
33 similar silicate mineralogy, cooling histories, and melt chemistry with type I chondrules in  
34 primitive carbonaceous meteorites.

35 In Semarkona chondrules, mesostasis glass is dominantly Al-Si-rich with substantial Ca and  
36 measurable alkalis<sup>52</sup> (typically 0.1–4 wt% Na<sub>2</sub>O and 0–0.2 wt% K<sub>2</sub>O). It also contains minor P, Cl,  
37 Ti, and Cr, and shows pronounced enrichments of Na, K, and Cl in outer zones where Ca is  
38 depleted. Dissolution of such a phase into an aqueous medium would have produced a Si- and  
39 Al-rich, mildly alkaline solution containing alkalis, halogens, and trace oxyanions. This inferred  
40 fluid composition — alkali-bearing, saline, and variably enriched in dissolved silica — suggests a  
41 mobile aqueous phase capable of reacting with other components of Bennu’s parent body.  
42 Although its subsequent fate remains uncertain, such a fluid must have migrated beyond the  
43 immediate chondrule environment, contributing to redistribution of major and trace elements  
44 within Bennu’s parent body. Finally, we note that the preservation of a well-organized barred  
45 and radial framework suggests that if mesostasis was present, its dissolution may have exploited  
46 pre-existing inter-crystalline cavities established during chondrule crystallization.

#### 47 ***Isotopic Heterogeneity in Bennu Chondrule Fragments***

48 The oxygen-isotopic compositions of olivine within Bennu chondrule fragments provide  
49 additional constraints on their origin and subsequent alteration (Fig. 6). The porphyritic olivine–  
50 pyroxene fragment in OREX-803437-100 plots along the PCM line and is consistent with an origin  
51 from a <sup>16</sup>O-rich reservoir typical of type I chondrules in CM and CR chondrites<sup>43,53</sup>. In contrast,  
52 the barred olivine fragment in OREX-803079-241, lying slightly above the PCM line, suggests  
53 partial equilibration with an isotopically heavier reservoir. This isotopic offset may reflect limited  
54 oxygen exchange with <sup>18</sup>O-enriched aqueous fluids during low-temperature alteration on Bennu  
55 or its progenitor body. The coexistence of both <sup>16</sup>O-rich and <sup>16</sup>O-poor chondrule fragments within  
56 Bennu indicates that materials derived from isotopically distinct nebular reservoirs were  
57 incorporated into a single parent body<sup>8</sup>. Such isotopic heterogeneity, combined with textural and

58 mineralogical evidence for variable aqueous processing, reinforces the interpretation that Benu  
 59 represents a complex accretionary aggregate of materials formed under diverse nebular and  
 60 parent-body conditions.

## 61 Supporting Data for Tables and Figures

62 **Supplementary Data 1. Figure and Table comparing results of EDX point spectra to Electron**  
 63 **Microprobe spot analyses (Methods Section)**

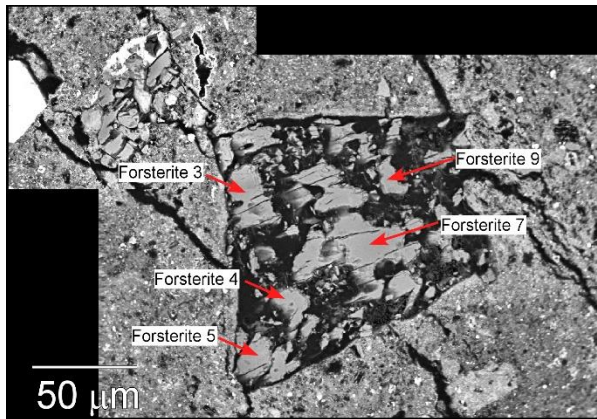

**Left view:** FESEM LAME image of the internal polished chondrule fragment in OREX-803079-241 (also see Fig. 4) showing locations of point analyses acquired by EMPA and SEM-EDX.

**Lower view:** Tabular results indicate EPMA-WDS and SEM-EDX analyses of the major and minor elements comprising chondrule olivine are comparable.

71

| Element (Wt%)                                                | O                   | Mg                  | Al                 | Si                  | Ca                 | Cr                 | Mn                 | Fe                 | Mg/Si (wt%) |
|--------------------------------------------------------------|---------------------|---------------------|--------------------|---------------------|--------------------|--------------------|--------------------|--------------------|-------------|
| <i>Microprobe<br/>(15 kV 20 nA 60 s.)</i>                    |                     |                     |                    |                     |                    |                    |                    |                    |             |
| Forsterite 3                                                 | 44.42               | 34.33               | 0.00               | 19.48               | 0.14               | 0.20               | 0.02               | 1.41               | 1.76        |
| Forsterite 4                                                 | 42.94               | 35.10               | 0.02               | 20.11               | 0.14               | 0.25               | 0.02               | 1.41               | 1.75        |
| Forsterite 5                                                 | 43.69               | 34.71               | 0.01               | 19.70               | 0.12               | 0.25               | 0.04               | 1.48               | 1.76        |
| Forsterite 7                                                 | 44.52               | 34.04               | 0.00               | 19.60               | 0.12               | 0.26               | 0.03               | 1.41               | 1.74        |
| Forsterite 9                                                 | 43.15               | 35.28               | 0.01               | 19.76               | 0.12               | 0.24               | 0.03               | 1.42               | 1.79        |
| <b>Ave ± STD</b>                                             | <b>43.75 ± 0.72</b> | <b>34.69 ± 0.52</b> | <b>0.01 ± 0.01</b> | <b>19.73 ± 0.24</b> | <b>0.13 ± 0.01</b> | <b>0.24 ± 0.02</b> | <b>0.03 ± 0.01</b> | <b>1.43 ± 0.03</b> | <b>1.76</b> |
| <i>SEM-EDX<br/>(15 kV 1 nA 30 s.<br/>O by stoichiometry)</i> |                     |                     |                    |                     |                    |                    |                    |                    |             |
| Forsterite 3                                                 | 44.87               | 33.73               | 0.04               | 19.31               | 0.11               | 0.25               | 0.04               | 1.65               | 1.75        |
| Forsterite 4                                                 | 44.92               | 33.66               | 0.05               | 19.40               | 0.13               | 0.27               | 0.02               | 1.55               | 1.74        |
| Forsterite 5                                                 | 44.88               | 33.69               | 0.07               | 19.30               | 0.13               | 0.32               | 0.03               | 1.58               | 1.75        |
| Forsterite 7                                                 | 44.94               | 33.76               | 0.05               | 19.39               | 0.12               | 0.29               | 0.07               | 1.38               | 1.74        |
| Forsterite 9                                                 | 44.94               | 33.84               | 0.07               | 19.33               | 0.14               | 0.23               | 0.07               | 1.38               | 1.75        |
| <b>Ave ± STD</b>                                             | <b>44.90 ± 0.03</b> | <b>33.74 ± 0.07</b> | <b>0.06 ± 0.01</b> | <b>19.35 ± 0.05</b> | <b>0.13 ± 0.01</b> | <b>0.27 ± 0.04</b> | <b>0.05 ± 0.02</b> | <b>1.51 ± 0.12</b> | <b>1.74</b> |
| <b>Forsterite Standard (Mg<sub>2</sub>SiO<sub>4</sub>)</b>   | <b>45.47</b>        | <b>34.56</b>        | <b>---</b>         | <b>19.97</b>        | <b>---</b>         | <b>---</b>         | <b>---</b>         | <b>---</b>         | <b>1.73</b> |

72

73

74 ***Supplementary Data for Table 2. SEM-EDX of Mineral Phases in OREX-803437-100 POP***  
75 ***Chondrule Fragment***

76 See file: Supplementary Data for Table 2.xlsx

77 ***Supplementary Data for Table 3. SEM-EDX of Mineral Phases in OREX-803079-241 Chondrule***  
78 ***Fragments (upper surface)***

79 See file: Supplementary Data for Table 3.xlsx

80 ***Supplementary Data for Table 4. SEM-EDX of Mineral Phases in OREX-803079-241 Chondrule***  
81 ***Fragment (internal/polished)***

82 See file: Supplementary Data for Table 4.xlsx

83 ***Supplementary Data for Table 5. SEM-EDX of Mineral Phases in OREX-803417-103 and OREX-***  
84 ***803429-100 Chondrule Fragments***

85 See file: Supplementary Data for Table 5

86 ***Supplementary Data Table for Figure 2a. Si/Mg vs. Fe/Mg for Bennu chondrules in comparison***  
87 ***to select literature data***

88 See file: Supplementary Data Table for Figure 2a.xlsx

89 ***Supplementary Data Table for Figure 6.  $\delta^{18}\text{O}$  vs.  $\delta^{17}\text{O}$  for Bennu chondrule olivine***

90 See file: Supplementary Data Table for Figure 6.xlsx

91

92 **Supplementary Data Table 7. Data and corresponding DOIs (Incomplete—TBD)**

| <b>Figure</b>        | <b>Sample Number</b>                | <b>Technique</b>    | <b>doi</b> |
|----------------------|-------------------------------------|---------------------|------------|
| 1a                   | OREX-803437-100                     | SEM                 |            |
| 1a-Inset image left  | OREX-803437-100                     | SEM                 |            |
| 1a-Inset image right | OREX-803437-100                     | SEM                 |            |
| 1b                   | OREX-803437-100                     | SEM/EDX map overlay |            |
| 2a                   | OREX-803437-100;<br>OREX-803079-241 | SEM/EDX             |            |
| 2b                   | OREX-803437-100;<br>OREX-803079-241 | SEM/EDX             |            |
| 2c                   | OREX-803437-100;<br>OREX-803079-241 | SEM/EDX             |            |
| 3a                   | OREX-803079-241                     | Optical             |            |
| 3b                   | OREX-803079-241                     | SEM                 |            |
| 3b-Inset             | OREX-803079-241                     | SEM                 |            |
| 3c                   | OREX-803079-241                     | SEM                 |            |
| 3c-Inset             | OREX-803079-241                     | SEM                 |            |
| 4a                   | OREX-803079-241                     | SEM                 |            |
| 4b                   | OREX-803079-241                     | SEM                 |            |
| 4c                   | OREX-803079-241                     | SEM                 |            |
| 4d                   | OREX-803079-241                     | SEM                 |            |
| 4e                   | OREX-803079-241                     | SEM/EDX             |            |
| 4f                   | OREX-803079-241                     | XCT reconstruction  |            |
| 4g                   | OREX-803079-241                     | XCT reconstruction  |            |
| 4h                   | OREX-803079-241                     | XCT reconstruction  |            |

|                              |                                     |                           |
|------------------------------|-------------------------------------|---------------------------|
| 5a                           | OREX-803417-103                     | SEM                       |
| 5b                           | OREX-803417-103                     | SEM                       |
| 5c                           | OREX-803417-103                     | SEM                       |
| 5d                           | OREX-803417-103                     | SEM                       |
| 5e                           | OREX-803417-103                     | SEM                       |
| 5f                           | OREX-803429-100                     | SEM                       |
| 5f-Insert                    | OREX-803429-100                     | Optical                   |
| 5g                           | OREX-803429-100                     | SEM                       |
|                              |                                     |                           |
| 6                            | OREX-803437-100;<br>OREX-803079-241 | NanoSIMS                  |
|                              |                                     |                           |
| <i>Extended Data Figures</i> |                                     |                           |
| 1a                           | OREX-803437-100                     | SEM                       |
| 1b                           | OREX-803437-100                     | SEM                       |
| 1c                           | OREX-803437-100                     | SEM                       |
| 1d                           | OREX-803437-100                     | SEM                       |
| 1e                           | OREX-803437-100                     | SEM/EDX                   |
| 1f                           | OREX-803437-100                     | SEM/EDX                   |
|                              |                                     |                           |
| 2a                           | OREX-800070-104                     | SEM FIB                   |
| 2b                           | OREX-800070-104                     | TEM FIB                   |
| 2c                           | OREX-800070-104                     | TEM/EDX FIB<br>collection |
| 2d                           | OREX-800070-104                     | TEM/FIB collection        |
| 2e                           | OREX-800070-104                     | TEM FIB                   |
| 2f                           | OREX-800070-104                     | TEM FIB                   |
| 2g                           | OREX-800070-104                     | TEM/EDX FIB<br>collection |

93

94

|                           |                 |                    |
|---------------------------|-----------------|--------------------|
| <i>2h</i>                 | OREX-800070-104 | TEM/FIB collection |
| <i>3a</i>                 | OREX-803079-100 | TEM FIB            |
| <i>3b</i>                 | OREX-803079-100 | TEM FIB            |
| <i>3c</i>                 | OREX-803079-100 | TEM/EDX FIB        |
| <i>3d</i>                 | OREX-803079-100 | TEM/EDX FIB        |
| <i>4a</i>                 | OREX-803079-101 | TEM FIB            |
| <i>4b</i>                 | OREX-803079-101 | TEM FIB            |
| <i>4c</i>                 | OREX-803079-101 | TEM FIB            |
| <i>4d</i>                 | OREX-803079-101 | TEM/EDX FIB        |
| <i>Supplementary Data</i> |                 |                    |
| <i>Video</i>              |                 |                    |
| <i>1</i>                  | OREX-803079-241 | XCT reconstruction |
| <i>2</i>                  | OREX-803079-241 | XCT reconstruction |
| <i>3</i>                  | OREX-803417-103 | XCT reconstruction |
| <i>Supplementary Data</i> |                 |                    |
| <i>1</i>                  |                 |                    |
| <i>Figure</i>             | OREX-803079-241 | SEM                |

**95    *Supplementary Data Video 1***

96    Reconstructed three-dimensional model of Bennu particle OREX-803079-241 (left view) from  
97    individual XCT tomograms (right views) that correspond to the location of the plane as it transects  
98    the particle. The location of a centrally located barred chondrule fragment is highlighted. As the  
99    particle matrix becomes translucent, locations of internal (false-colored) chondrule fragments  
100    are shown. The highlighted barred chondrule fragment is false-colored orange, and subsequently  
101    magnified and oriented to reveal that it is composed of semi-parallel, elongated bars. A total of  
102    35 internal chondrule fragments were identified within this particle.

**103    *Supplementary Data Video 2***

104    Reconstructed XCT view of the centrally located barred olivine pyroxene chondrule fragment  
105    (false-colored orange) in Bennu particle OREX-803079-241 (see Supplementary Data Video 1).  
106    After XCT imaging, this particle was polished to reveal this internal chondrule fragment (see Fig.  
107    4).

**108    *Supplementary Data Video 3***

109    Reconstructed three-dimensional model of Bennu particle OREX-803417-103 (left view) from  
110    individual XCT tomograms (right views) that correspond to the location of the plane as it transects  
111    the particle. As the matrix is removed, chondrule fragments (false-colored green) become visible.  
112    One of the fragments breaching the particle surface is highlighted, magnified and oriented to  
113    reveal a texture composed of semi-parallel, elongated plates. The location of this chondrule  
114    fragment, which breaches the particle surface, is shown in Fig. 5a-c.

115
